# Supplementary material for: Seasonal differences exist in the polyunsaturated fatty acid, mineral and antioxidant content of U.S. grass-finished beef
Source: PLoS One. 2020 Feb 26;15(2):e0229340. doi: 10.1371/journal.pone.0229340 (PMC7043805; doi:10.1371/journal.pone.0229340)
Supplement: S2 Table — Welch t-test used to asses if significant differences existed between seasons for a given producer. One-Way ANOVA used to compare seasonal FAs among producers with Tukey’s post-hoc test. Results of Tukey’s test are in separate tabs for each season. ALA, alpha-linolenic acid; CLA, conjugated linoleic acid; DGLA, dihomo-gamma linolenic acid; DHA, docosahexaenoic acid; DPA, docosapentaenoic acid; EPA, eicosapentaenoic acid; FA, fatty acid; MUFA, monounsaturated FA; n-3, omega-3; n-6, omega-6; PUFA, polyunsaturated fatty acid; SFA, saturated FA. (XLSX) [file pone.0229340.s004.xlsx]

## Sheet: mean+SEM
	P2 F	P2 S	P2.season.p	P4 F	P4 S	P4.season.p	P5 F	P5 S	P5.season.p	P8 F	P8 S	P8.season.p
SFA	575.7±62.01	350.22±25.24	0.002	375.13±33.13	564.51±30.69	0	367.83±38.69	368.86±37.27	0.867	238.02±12.82	237.08±10.4	0.834
MUFA	597.3±60.4	357.43±28.29	0.002	345.3±32.82	570.14±33.87	0	372.02±43.48	377.33±45.18	0.831	232.96±13.47	236.37±11.19	0.915
PUFA	76.6±4.35	69.99±2.35	0.243	102.16±4.75	134.61±4.22	0	88.32±4.07	95.44±4.54	0.236	67.96±1.84	74.24±1.56	0.007
n.6	60.99±3.76	55.06±1.84	0.282	97.6±4.58	125.29±4.52	0	81.83±4.11	87.63±4.2	0.253	52.67±1.8	54.46±1.53	0.447
n.3	13.95±1.08	13.75±0.59	0.884	3.76±0.26	7.47±0.85	0	5.3±0.56	6.55±0.39	0.007	13.92±0.54	17.8±0.54	0
n.6.n.3	4.78±0.35	4.1±0.1	0.285	30.07±2.29	27.14±1.91	0.034	23.41±2.34	14.87±1.02	0.062	5.62±0.83	3.75±0.22	0.003
SFA.PUFA	7.53±0.68	5.02±0.31	0.004	3.68±0.25	4.22±0.19	0.062	4.18±0.39	3.7±0.26	0.646	3.49±0.16	3.18±0.11	0.072
Total.FA	1249.6±123.08	777.65±54.24	0.002	822.6±68.39	1269.26±66.85	0	828.17±83.74	841.63±85.23	0.828	538.94±27.01	547.68±22.31	0.904
Myristic	27.41±3.73	16.49±1.58	0.005	18.78±2.21	29.42±2.31	0	18.14±2.23	19.98±2.34	0.502	10.22±0.75	9.84±0.64	0.35
Myristoleic	7.11±0.83	4.42±0.51	0.001	5.36±0.67	8.17±0.76	0.005	5.02±0.52	5.45±0.6	0.683	3.01±0.17	2.59±0.17	0.001
Palmitic	387.91±42.79	231.32±17.72	0.002	231.25±21.03	356.34±20.67	0	234.75±24.77	233.67±24.15	0.888	148.79±8.55	146.41±6.8	0.679
Palmitoleic	42.34±4.54	29.52±2.72	0.013	23.37±2.4	41.83±3.11	0	26.9±3	29.64±3.61	0.535	17.13±1.17	16.81±0.92	0.675
Margaric	11.99±1.45	7.63±0.56	0.01	10.31±1.04	15.41±1.25	0.005	8.96±1.02	11.29±1.43	0.195	5.33±0.29	5.54±0.24	0.638
Stearic	147.95±14.57	94.18±5.63	0.003	114.66±9.34	162.67±7.38	0	105.77±11.2	103.53±9.87	0.97	73.23±3.41	74.59±2.84	0.781
Oleic	547.86±55.52	323.49±25.35	0.002	316.58±30.03	520.14±30.44	0	340.1±40.18	342.25±41.34	0.859	213.02±12.25	216.97±10.18	0.967
Linoleic	43.41±3.02	36.65±1.41	0.1	70.29±3.26	91.31±3.52	0	59.18±3.29	64.07±3.47	0.226	35.36±1.38	35.9±1.14	0.815
ALA	6.84±0.59	5.83±0.26	0.19	1.46±0.12	3.26±0.47	0	2±0.3	1.76±0.16	0.656	6.5±0.29	7.28±0.27	0.082
CLA	1.66±0.23	1.18±0.14	0.057	0.83±0.13	1.85±0.19	0	1.21±0.22	1.26±0.22	0.792	1.37±0.11	1.98±0.12	0
DGLA	3.38±0.24	3.41±0.13	0.637	4.55±0.24	6.49±0.23	0	3.88±0.22	4.64±0.2	0.008	2.75±0.11	3.25±0.09	0
Arachidonic	14.21±0.7	15.01±0.54	0.394	22.76±1.46	27.49±0.98	0.007	18.77±0.89	18.91±0.89	0.801	14.6±0.44	15.31±0.39	0.217
EPA	2.9±0.36	3±0.2	0.394	0.76±0.07	1.52±0.2	0.003	1.3±0.16	1.79±0.14	0.005	3.6±0.16	4.87±0.18	0
Tricosanoic	0.33±0.03	0.37±0.02	0.12	0.18±0.01	0.34±0.01	0	0.21±0.01	0.25±0.02	0.218	0.29±0.01	0.38±0.01	0
Lignoceric	0.48±0.02	0.53±0.02	0.427	0.32±0.01	0.65±0.02	0.001	0.34±0.01	0.48±0.02	0.002	0.42±0.02	0.62±0.01	0
DPA	3.94±0.24	4.67±0.2	0.024	1.59±0.11	2.79±0.2	0	1.99±0.15	2.88±0.17	0	3.72±0.13	5.36±0.14	0
DHA	0.28±0.03	0.35±0.02	0.024	0.19±0.01	0.23±0.01	0.2	0.23±0.02	0.3±0.02	0.017	0.3±0.02	0.37±0.01	0.001
P= Producer
F= fall
S= spring
P#.season.p = results of Welch t-test for intraproducer seasonal comparison
Data is in units mg FA/100g tissue

## Sheet: Tukey_fall
Variable	Producer 2	Producer 4	Producer 5	Producer 8
SFA	a	b	b	c
MUFA	a	b	b	c
PUFA	bc	a	ab	c
n.6	c	a	b	c
n.3	a	b	b	a
n.6.n.3	c	a	b	c
SFA.PUFA	a	b	b	b
Total.FA	a	b	b	c
Myristic	a	ab	b	c
Myristoleic	a	ab	b	c
Palmitic	a	b	b	c
Palmitoleic	a	b	b	c
Margaric	a	ab	b	c
Stearic	a	ab	b	c
Oleic	a	b	b	c
Linoleic	c	a	b	c
ALA	a	b	b	a
CLA	a	c	bc	ab
DGLA	bc	a	ab	c
Arachidonic	b	a	a	b
EPA	a	b	b	a
Tricosanoic	a	b	b	a
Lignoceric	a	b	ab	ab
DPA	a	b	b	a
DHA	a	a	a	a

## Sheet: Tukey_spring
Variable	Producer 2	Producer 4	Producer 5	Producer 8
SFA	b	a	b	c
MUFA	b	a	b	c
PUFA	c	a	b	c
n.6	c	a	b	c
n.3	b	c	c	a
n.6.n.3	c	a	b	d
SFA.PUFA	a	ab	bc	c
Total.FA	b	a	b	c
Myristic	b	a	b	c
Myristoleic	b	a	b	c
Palmitic	b	a	b	c
Palmitoleic	b	a	b	c
Margaric	b	a	b	c
Stearic	b	a	b	c
Oleic	b	a	b	c
Linoleic	c	a	b	c
ALA	a	b	c	a
CLA	b	a	b	a
DGLA	c	a	b	c
Arachidonic	c	a	b	c
EPA	b	d	c	a
Tricosanoic	a	a	b	a
Lignoceric	b	a	b	a
DPA	a	b	b	a
DHA	a	b	ab	a
